# Supplementary material
Source: PubMed Central journal article supplement (PMC4613382)
Supplement: 10.3163.1536-5050.103.4.008.sg001.pdf [file 10.3163.1536-5050.103.4.008.sg001.pdf]

## Information and informatics literacies of first-year medical students

Joshua E. Richardson, PhD, MLIS, MS; Daina R. Bouquin, MLIS, CAS; Lyubov L. Tmanova, MLIS, MS, DVM; Drew Wright, MS, MLS

### APPENDIX

#### Survey for incoming class of medical students to gauge their levels of information literacy and learning styles

##### Information resources

1. On average, how often do you use the Internet for biomedical research?
  - Once a week
  - Multiple times a week
  - Once a day
  - Multiple times a day
  
2. Which of these biomedical-related databases have you used? Please select any that apply.
  - BIOSIS
  - Ovid MEDLINE
  - PubMed
  - Scopus
  - Web of Science
  - None of the above
  
3. Do you use more than trial and error to find information on the Internet?
  - Yes
  - No
  
4. What criterion or criteria is best for evaluating Internet-based biomedical information? Please select any that apply.
  - Accuracy
  - Authority
  - Availability
  - Findability
  - Legibility
  - Objectivity
  - Relevance
  - Timeliness
  - Usability

5. In general, which learning format do you prefer?

- Self-paced online
- Real-time web-based seminar
- One-on-one in-person instruction
- Small in-person group instruction (eight or less)
- Large in-person group instruction (nine or more)

6. Please rank your preferred technologies for accessing online biomedical information.

|                               | <u>Least preferred</u> | <u>Less preferred</u> | <u>More preferred</u> | <u>Most preferred</u> |
|-------------------------------|------------------------|-----------------------|-----------------------|-----------------------|
| Smartphones                   | <input type="radio"/>  | <input type="radio"/> | <input type="radio"/> | <input type="radio"/> |
| Tablets (iPad, Surface, etc.) | <input type="radio"/>  | <input type="radio"/> | <input type="radio"/> | <input type="radio"/> |
| Laptops                       | <input type="radio"/>  | <input type="radio"/> | <input type="radio"/> | <input type="radio"/> |
| Desktops                      | <input type="radio"/>  | <input type="radio"/> | <input type="radio"/> | <input type="radio"/> |

7. Would you come to the library to seek assistance with finding research-related information?

- Yes
- No

8. A “personal librarian” service would link each Weill Cornell Medical College (WCMC) student with one librarian who would guide information seeking and generally help with research. How likely is it that you would enroll in this service if it were available through the WCMC Library?

- Unlikely
- Somewhat unlikely
- Neutral
- Somewhat likely
- Very likely

### Health informatics

1. Have you ever seen an electronic health record (EHR)?

- Yes
- No

2. Which EHR? \_\_\_\_\_

3. Have you ever seen a personal health record (PHR)?

- Yes
- No

4. Which PHR? \_\_\_\_\_

5. What is your level of interest for learning more about EHRs and PHRs?

- Not at all interested
- Slightly interested
- Moderately interested
- Very interested
- Extremely interested

6. What level of expertise do you have with each of the following types of software.

|                                                                           | Don't know<br>what that is | Novice                | Proficient            | Expert                | Not sure              |
|---------------------------------------------------------------------------|----------------------------|-----------------------|-----------------------|-----------------------|-----------------------|
| Spreadsheets (i.e.,<br>Microsoft Excel)                                   | <input type="radio"/>      | <input type="radio"/> | <input type="radio"/> | <input type="radio"/> | <input type="radio"/> |
| Databases (i.e.,<br>Microsoft Access,<br>MySQL)                           | <input type="radio"/>      | <input type="radio"/> | <input type="radio"/> | <input type="radio"/> | <input type="radio"/> |
| Computer<br>programming or<br>scripting (i.e.,<br>Python, JAVA,<br>PHP,R) | <input type="radio"/>      | <input type="radio"/> | <input type="radio"/> | <input type="radio"/> | <input type="radio"/> |
| Statistical software<br>packages (i.e., SPSS,<br>STATA, SAS)              | <input type="radio"/>      | <input type="radio"/> | <input type="radio"/> | <input type="radio"/> | <input type="radio"/> |

7. What is your level of interest for learning more about the above types of software?

|                                                                          | Not at all<br>interested | Slightly<br>interested | Moderately<br>interested | Very<br>interested    | Extremely<br>interested |
|--------------------------------------------------------------------------|--------------------------|------------------------|--------------------------|-----------------------|-------------------------|
| Spreadsheets (i.e.<br>Microsoft Excel)                                   | <input type="radio"/>    | <input type="radio"/>  | <input type="radio"/>    | <input type="radio"/> | <input type="radio"/>   |
| Databases (i.e.<br>Microsoft Access,<br>MySQL)                           | <input type="radio"/>    | <input type="radio"/>  | <input type="radio"/>    | <input type="radio"/> | <input type="radio"/>   |
| Computer<br>programming or<br>scripting (i.e.<br>Python, JAVA,<br>PHP,R) | <input type="radio"/>    | <input type="radio"/>  | <input type="radio"/>    | <input type="radio"/> | <input type="radio"/>   |
| Statistical software<br>packages (i.e. SPSS,<br>STATA, SAS)              | <input type="radio"/>    | <input type="radio"/>  | <input type="radio"/>    | <input type="radio"/> | <input type="radio"/>   |

## Bioinformatics

1. Which of the following biological databases have you used for any biomedical research?

- GenBank
- GEO
- Gene
- RefSeq
- I have not used any of the above
- Other: \_\_\_\_\_

2. How would you rate yourself as a user of the National Center for Biomedical Informatics Entrez GQuery cross-database tool?

- Beginner
- Intermediate
- Advanced
- Expert
- I have never used this tool

3. Please indicate your level of expertise with any of the following biological research tools.

|                | Don't know<br>what that is | Novice                | Proficient            | Expert                | Not sure              |
|----------------|----------------------------|-----------------------|-----------------------|-----------------------|-----------------------|
| BLAST          | <input type="radio"/>      | <input type="radio"/> | <input type="radio"/> | <input type="radio"/> | <input type="radio"/> |
| ddSNP          | <input type="radio"/>      | <input type="radio"/> | <input type="radio"/> | <input type="radio"/> | <input type="radio"/> |
| dCHIP          | <input type="radio"/>      | <input type="radio"/> | <input type="radio"/> | <input type="radio"/> | <input type="radio"/> |
| Bioconductor R | <input type="radio"/>      | <input type="radio"/> | <input type="radio"/> | <input type="radio"/> | <input type="radio"/> |
| DAVID          | <input type="radio"/>      | <input type="radio"/> | <input type="radio"/> | <input type="radio"/> | <input type="radio"/> |
| Cytoscape      | <input type="radio"/>      | <input type="radio"/> | <input type="radio"/> | <input type="radio"/> | <input type="radio"/> |
| Cn3D           | <input type="radio"/>      | <input type="radio"/> | <input type="radio"/> | <input type="radio"/> | <input type="radio"/> |

4. What is your level of interest for learning more about these biological research tools?

|                | Not at all<br>interested | Slightly<br>interested | Moderately<br>interested | Very<br>interested    | Extremely<br>interested |
|----------------|--------------------------|------------------------|--------------------------|-----------------------|-------------------------|
| BLAST          | <input type="radio"/>    | <input type="radio"/>  | <input type="radio"/>    | <input type="radio"/> | <input type="radio"/>   |
| ddSNP          | <input type="radio"/>    | <input type="radio"/>  | <input type="radio"/>    | <input type="radio"/> | <input type="radio"/>   |
| dCHIP          | <input type="radio"/>    | <input type="radio"/>  | <input type="radio"/>    | <input type="radio"/> | <input type="radio"/>   |
| Bioconductor R | <input type="radio"/>    | <input type="radio"/>  | <input type="radio"/>    | <input type="radio"/> | <input type="radio"/>   |
| DAVID          | <input type="radio"/>    | <input type="radio"/>  | <input type="radio"/>    | <input type="radio"/> | <input type="radio"/>   |
| Cytoscape      | <input type="radio"/>    | <input type="radio"/>  | <input type="radio"/>    | <input type="radio"/> | <input type="radio"/>   |
| Cn3D           | <input type="radio"/>    | <input type="radio"/>  | <input type="radio"/>    | <input type="radio"/> | <input type="radio"/>   |

5. What is your level of interest for learning more about electronic laboratory management tools such as Lab Archives?

- Not at all interested
- Slightly interested
- Moderately interested
- Very interested
- Extremely interested

### Demographics

1. Weill Cornell educational track

- Medical student
- Graduate student
- MD/PhD student

2. Age

- 20 or younger
- 21–25
- 26–30
- 30–34
- 35 or older

3. Race (Select any or all that apply)

- White
- Black or African American
- American Indian or Alaska Native
- Asian
- Native Hawaiian or other Pacific Islander
- Decline to answer

4. Ethnicity

- Hispanic or Latino
- Not Hispanic or Latino
- Decline to answer

5. Gender

- Male
- Female

6. Highest degree achieved

- BS
- BA
- Master's
- MD
- PhD
- Other: \_\_\_\_\_
