# Supplementary material
Source: PubMed Central journal article supplement (PMC4613382)

## Information and informatics literacies of first-year medical students

Joshua E. Richardson, PhD, MLIS, MS; Daina R. Bouquin, MLIS, CAS; Lyubov L. Tmanova, MLIS, MS, DVM; Drew Wright, MS, MLS

**Figure 2**

Students' likelihood of using a "personal librarian" throughout their first year

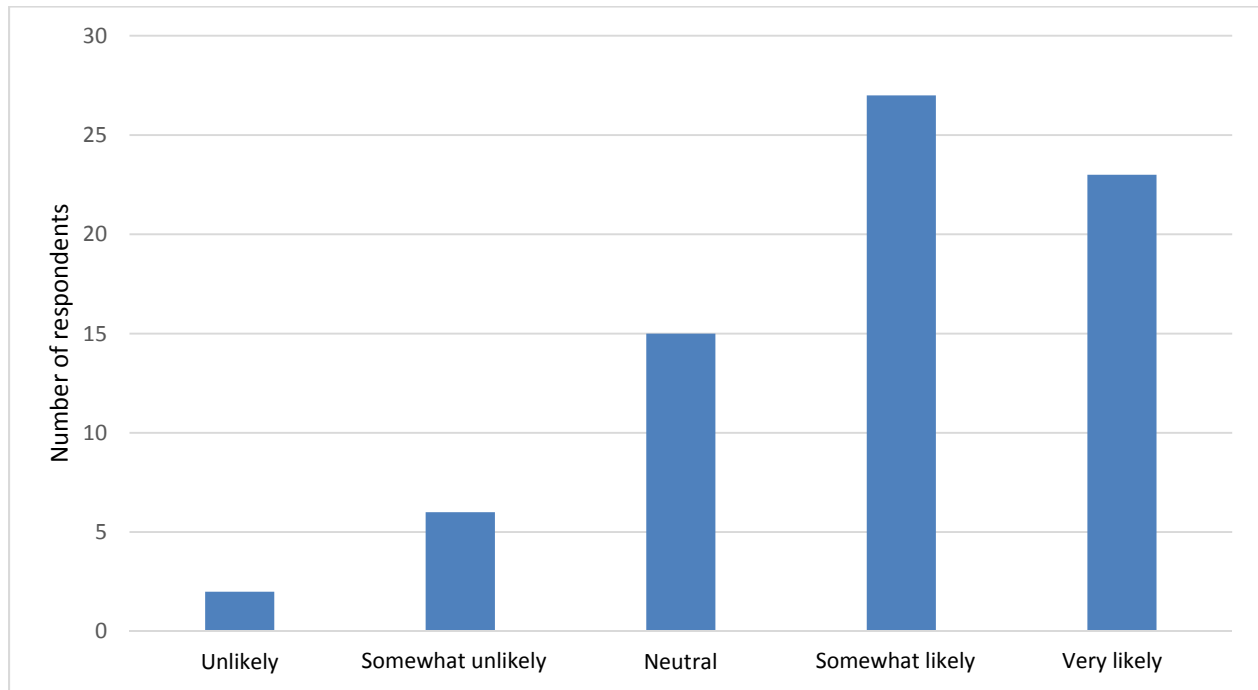

Supplement: 10.3163.1536-5050.103.4.008.sg002.pdf [file 10.3163.1536-5050.103.4.008.sg002.pdf]
