# Supplementary material
Source: PubMed Central journal article supplement (PMC4613382)

### Information and informatics literacies of first-year medical students

Joshua E. Richardson, PhD, MLIS, MS; Daina R. Bouquin, MLIS, CAS; Lyubov L. Tmanova, MLIS, MS, DVM; Drew Wright, MS, MLS

**Figure 3**

Medical students' levels of preference for technology to access biomedical information

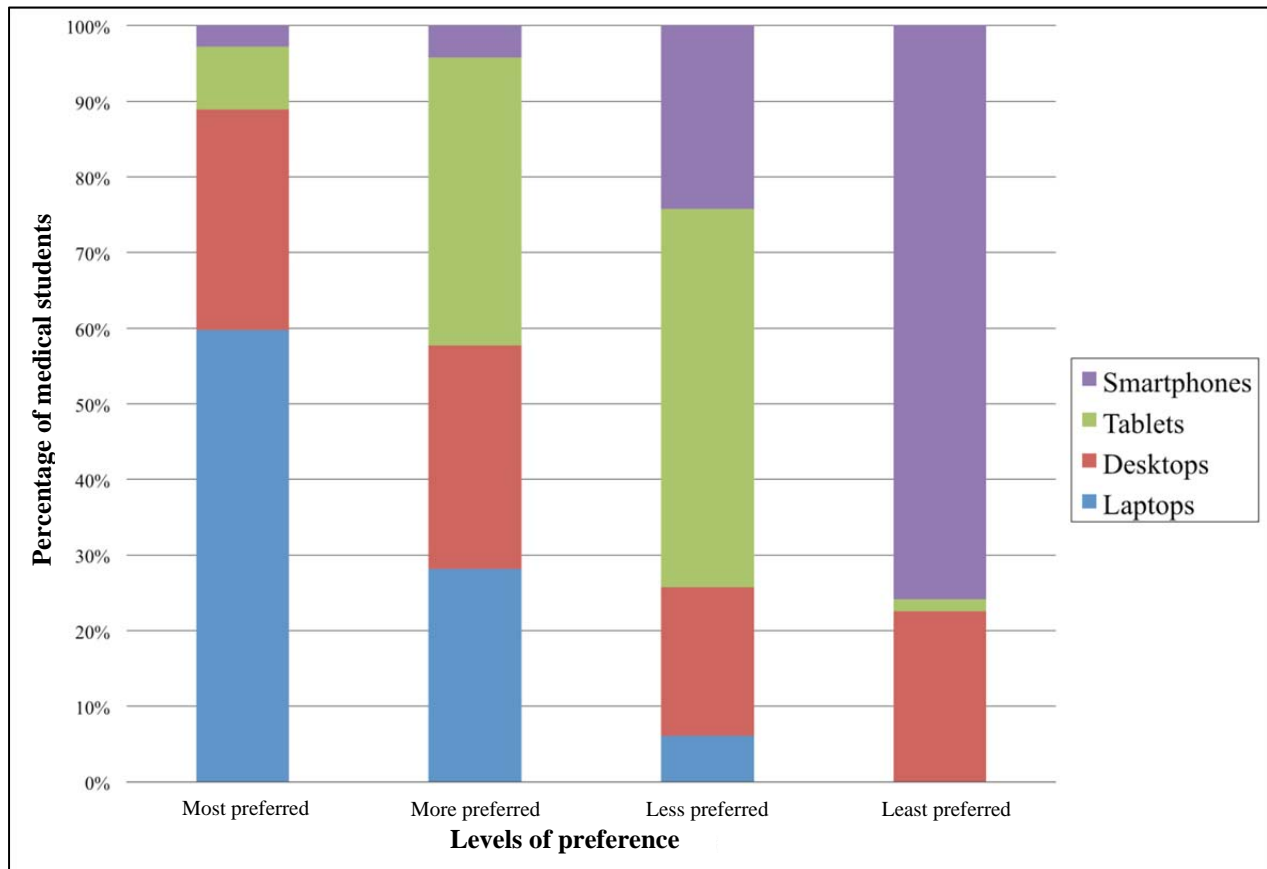

Supplement: 10.3163.1536-5050.103.4.008.sg003.pdf [file 10.3163.1536-5050.103.4.008.sg003.pdf]
